# Supplementary material
Source: PubMed Central journal article supplement (PMC7985826)
Supplement: nlab018_supplementary_figure.pdf [file nlab018_supplementary_figure.pdf]

**Supplemental Figure 1:** STR profiles for all cell lines utilized.

| <b>Loci</b> | <b>Med 211 px26</b> |
|-------------|---------------------|
| AMEL        | X,Y                 |
| CSF1PO      | 11                  |
| D13S317     | 13,14               |
| D16S539     | 11,12               |
| D21S11      | 30                  |
| D5S818      | 10,11               |
| D7S820      | 11                  |
| TH01        | 6,8                 |
| TPOX        | 10,11               |
| vWA         | 15,18               |

| <b>Loci</b> | <b>D425</b> |
|-------------|-------------|
| AMEL        | X           |
| CSF1PO      | 9,12        |
| D13S317     | 11          |
| D16S539     | 11,12       |
| D21S11      | 29,33.2     |
| D5S818      | 12,13,14    |
| D7S820      | 11,12       |
| TH01        | 6,9.3       |
| TPOX        | 8           |
| vWA         | 16,17       |

| <b>Loci</b> | <b>D283_MED</b> |
|-------------|-----------------|
| AMEL        | X,Y             |
| CSF1PO      | 9,12            |
| D13S317     | 8,10            |
| D16S539     | 11              |
| D21S11      | 28,30.2         |
| D5S818      | 11              |
| D7S820      | 10              |
| TH01        | 7               |
| TPOX        | 8,11            |
| vWA         | 16,18           |

» Loci with one allele listed are homozygous for that STR marker.
